# Supplementary material
Source: PubMed Central journal article supplement (PMC3241784)
Supplement: 1112586108_pnas.201112586SI.pdf [file 1112586108_pnas.201112586SI.pdf]

# Supporting Information

Golden et al. 10.1073/pnas.1112586108

## SI Text

**Meat Consumption Patterns.** Household wildlife consumption ranged from 0 to over 53 kg of wildlife per year in the study households. The proportional composition of wildlife in the diet over total meat consumption ranged from 0% to 76%, with a mean of 16% and a median of 14% (Fig. S2). There was a negative correlation ( $-0.40$ ,  $P$  value  $< 0.0005$ ) between household income and the proportional mass-by-weight of wildlife over total meat consumption in the diet. Thus, there was a greater relative reliance on wildlife as an animal source food in lower income households. Wildlife consumption was positively skewed, with median household consumption at  $\sim 8.75$  kg per year.

**Household and Individual Level Characteristics of the Study Population.** A high prevalence of stunting is often a marker of a chronically malnourished population, whereas a high prevalence of wasting (low weight-for-height z-score) is a marker of acute malnutrition. This population appears to be chronically undernourished, evidenced by high rates of stunting and very low rates of wasting (Table S1). Hemoglobin concentrations were normally distributed in our study population (mean 11.7, SD: 1.3 g/dL) and we categorized 42% of children as anemic. The mean hemoglobin concentrations show that this population is on the fringe of being healthy. Hemoglobin thresholds for anemia are known to be subjective and individuals may not experience symptoms when deemed anemic and may be symptomatic even when their hemoglobin is above the threshold.

**Calculating Harvest Rates and Harvest Areas.** We conducted semi-structured interviews in 481 households in 26 villages from January-December 2007 throughout the Makira Protected Area. We identified households within selected villages through systematic random-sampling techniques and recruited them over a period of several years, starting in 2004. We also estimated through oral recall the total number of individuals of each of the 23 locally occurring mammalian bushmeat species that were consumed by the household during the prior year (1; see ref. 2 for

validation of method). Total harvest for each village was then determined by extrapolating the sample to the actual village population sizes. We calculated a range in biomass harvested by using published estimates of species body mass (3). Harvest area was calculated as a circle surrounding a village center, with a mean radius of 4.4 km and a SD of 2.9 km, determined by hunter reports of either distance or time traveled to actively hunt or passively trap lemurs (see ref. 1 for details). We assumed the maximum harvest area to be the forested area within the mean harvest radius plus one SD.

**Strategies to Alleviate Anemia.** Although supplementation (through pills or other vehicles), fortification (integration of nutrients into the food supply like iodized salt), and biofortification (genetically modifying crops to enhance their nutritional value) are efficacious strategies to alleviate iron-deficiency anemia (4–7), there are also several prominent drawbacks. Supplementation is very expensive and only designed for short-term interventions (8), and fortification, although cost-effective in the long term, is often prohibitively expensive for developing countries that may be particularly at risk for a heavy burden of anemia (8). In addition, because iron supplementation improves iron status without improving general health and other micronutrient deficiencies, blood may become richer in red blood cells without correlative improvements in other micronutrient health and immunity. In certain cases, this type of supplementation has been shown to place populations at increased risk for other micronutrient deficiencies or malarial morbidity (9–11). Therefore, dietary diversification and the integration of animal-source foods into the diet is likely the best solution to iron-deficiency anemia on a population level in this setting. These strategies are likely to be more rapidly adopted by local people and can treat anemia in a holistic fashion that does not compromise the immune health or micronutrient status of the individual. Because such vast quantities of iron and zinc are required by people during periods of rapid growth, dietary diversification of vegetarian diets only would likely not satisfy nutritional demand.

1. Golden CD (2009) Bushmeat hunting and use in the Makira Forest north-eastern Madagascar: A conservation and livelihoods issue. *Oryx* 43:386–392.
2. Brashares JS, Golden CD, Weinbaum KZ, Barrett CB, Okello GV (2011) Economic and geographic drivers of wildlife consumption in rural Africa. *Proc Natl Acad Sci USA* 108:13931–13936.
3. Garbutt N (2007) *Mammals of Madagascar: a Complete Guide* (Yale Univ Press, New Haven, CT).
4. Yip R (1996) Iron supplementation during pregnancy: Is it effective? *Am J Clin Nutr* 63:853–855.
5. Mannar V, Gallego EB (2002) Iron fortification: Country level experiences and lessons learned. *J Nutr* 132(4, Suppl):856S–858S.
6. Lucca P, Hurrell R, Potrykus I (2002) Fighting iron deficiency anemia with iron-rich rice. *J Am Coll Nutr* 21(3, Suppl):184S–190S.
7. Levin HM (1986) A benefit-cost analysis of nutritional programs for anemia reduction. *World Bank Res Obs* 1:219–245.
8. Oppenheimer SJ, et al. (1986) Iron supplementation increases prevalence and effects of malaria: Report on clinical studies in Papua New Guinea. *Trans R Soc Trop Med Hyg* 80:603–612.
9. Meadows NJ, Grainger SL, Ruse W, Keeling PWN, Thompson RPH (1983) Oral iron and the bioavailability of zinc. *Br Med J (Clin Res Ed)* 287:1013–1014.
10. Whittaker P (1998) Iron and zinc interactions in humans. *Am J Clin Nutr* 68(2, Suppl):442S–446S.
11. Kordas K, Stoltzfus RJ (2004) New evidence of iron and zinc interplay at the enterocyte and neural tissues. *J Nutr* 134:1295–1298.



**Table S1. Household and individual level characteristics of the study population**

| Variable                                               | Mean (SD)/percentage |
|--------------------------------------------------------|----------------------|
| <b>Household variables</b>                             |                      |
| Household size (no. of people)                         | 5.36 (1.73)          |
| Annual wildlife consumption (kg) [median (IQR)]        | 8.75 (13.35)         |
| Annual income [median (IQR)]                           | \$153.33 (\$185.64)  |
| <b>Maternal education</b>                              |                      |
| No education                                           | 25%                  |
| Primary education                                      | 61%                  |
| Secondary education                                    | 14%                  |
| <b>Ethnicity</b>                                       |                      |
| Betsimisaraka                                          | 89%                  |
| Tsimihety                                              | 11%                  |
| <b>Individual variables</b>                            |                      |
| Female                                                 | 55%                  |
| Annual wildlife consumption (kg) [median (IQR)]        | 0.97 (1.98)          |
| <b>Hemoglobin concentration (g/dL)</b>                 |                      |
| Average hemoglobin concentration (g/dL)                | 11.7 (1.3)           |
| Hemoglobin concentration (g/dL) for children < 5 y old | 11.2 (1.3)           |
| Hemoglobin concentration (g/dL) for children ≥ 5 y old | 12.0 (1.2)           |
| <b>Anemia</b>                                          |                      |
| Average anemia                                         | 42%                  |
| Anemia for children < 5 y old                          | 39%                  |
| Anemia for children > 5 y old                          | 44%                  |
| HFA z-score                                            | -1.18 (1.88)         |
| BMI for age z-score                                    | -0.3 (0.69)          |
| WFH z-score                                            | -0.32 (0.72)         |
| Time since deworming (mo)                              | 2.84 (2.56)          |

Household size is the unweighted number of individuals in a household. Annual wildlife consumption in the household was measured as the number of kilograms of meat consumed by the household. IQR, interquartile range. Annual income was measured as the total value of wages earned, products sold, and items bartered. A conversion rate of \$1 = 1,800 Malagasy ariary was used. For ethnicity, Betsimisaraka and Tsimihety represent the two primary ethnic groups in this region. Annual wildlife consumption for individuals is calculated by multiplying household consumption by a proportion allocated to an individual as derived from observation in the intrahousehold allocation study. Hemoglobin concentrations were measured using a HemoCue Hb 201+ (1). Anemia was defined as hemoglobin concentrations less than 11.0 g/dL in children 0–5 y of age and 12.0 g/dL in children 5–12 y of age (2). HFA z-score is a standardized value of vertical height by age, where children below two SDs are considered stunted or abnormally short for their age (a condition secondary to malnutrition). BMI (Body mass index) for age z-score is a standardized measure, which is the ratio of a child's weight to his height squared. WFH (Weight-for-height) z-score is a standardized measure of acute malnutrition where a value two SDs below the mean of zero is considered wasting (a form of severe undernutrition).

1. Bäck S-E, et al. (2004) Multi-site analytical evaluation of a new portable analyzer, HemoCue Hb 201+, for point of care testing. *Point of Care* 3:60–65.
2. World Health Organization (1994) *Indicators and Strategies for Iron Deficiency and Anemia Programmes* (WHO/UNICEF/UNU Consultation, Geneva).
